# Supplementary material
Source: publisher figshare collection journal article supplement (https://acs.figshare.com/ndownloader/files/15207029)
Supplement: Supplementary file 1 [file 15207029]

# **The Base Pair Contents and Sequences of DNA Double Helixes Differentiated by Surface-Enhanced Raman Spectroscopy**

*Yang Li, <sup>a</sup> Tianyang Gao,<sup>a</sup> Guantong Xu, <sup>a</sup> Xiaoxuan Xiang, <sup>a</sup> Xiaoxia Han,<sup>a</sup> Bing Zhao<sup>a</sup> and Xinhua Guo<sup>\*a,b</sup>.*

<sup>a</sup> State Key Laboratory of Supramolecular Structure and Materials, College of Chemistry, Jilin University, 2699 Qianjin Street, Changchun 130012, P. R. China.

<sup>b</sup> Key Laboratory for Molecular Enzymology and Engineering of the Ministry of Education, College of Life Science, Jilin University, Changchun 130012, P.R. China

## **Corresponding Author**

\* Dr. Xinhua Guo. Tel: 86-431-89228949; Fax: 86-431-89228949;

E-mail: guoxh@jlu.edu.cn

## **EXPERIMENTAL METHODS**

### **Ag IANPs preparation**

The AgIANPs was prepared based on our previous work.<sup>1</sup> Briefly, 5 mL of sodium citrate-reduced silver sol was centrifuged (5000 rpm, 15 min, 15 ° C), after the removal of the supernatant, 50  $\mu$ L of the centrifuged silver sol was mixed with 50  $\mu$ L of potassium iodide solution (1 mM) at room temperature for 25 minutes. Then, the mixture was further mixed with 50  $\mu$ L DNA sample and 20  $\mu$ L of  $\text{Al}^{3+}$  (0.01 M  $\text{Al}_2(\text{SO}_4)_3$ ) one after another. After that, the mixture was shaken well for SERS detection. The SERS test instrument is made by Kaiser Optical Systems Inc. (Tokyo, Japan). The laser wavelength is 633 nm, the scan time is 10 s, and each test is accumulated twice. All DNA sequences (linear, hairpin or dsDNA) were analyzed at 1  $\mu$ M concentration throughout the SERS assay unless otherwise stated.

### **Sample preparation for SERS**

DNA strands (HPLC grade) (Table 1) were purchased from Sangon Biotech (Shanghai) Co., Ltd. (Shanghai, China). 100  $\mu$ M DNA samples are annealed in 50 mM ammonium acetate solution to form hairpin conformations by heating them in 90 °C water bath for 10 minutes followed by cooling down to room temperature. Ultra-pure water was used throughout the experiment.

### **CD spectroscopy**

CD spectra were recorded on a J-810 CD spectrometer (JASCO, Tokyo, Japan) using 0.2 mm path length Hellma cell at the room temperature. Spectra were recorded from 320 to 200 nm and presented as the averages of three scans. Each trace was measured at 100 nm/min of scanning speed, 1 nm data pitch and 1 nm bandwidth. The background spectra corresponding to the buffer alone were subtracted from all DNA spectra. The final DNA concentration for CD detection is 25  $\mu$ M.

### Normalized peak position analysis

To determine the normalization peak, we find that, between the two hairpin conformations (2HP4a and 2HP4b), the unique difference is the base pair sequence (Figure S3). Thus, we hold the hypothesis that the unusual SERS spectra of the DNA hairpins formed by the strands with the same composition and the different base sequences, may be due to the characteristic peaks normalized in an inaccurate way, as the position of phosphodiester group to the surface of silver nanoparticles varies along the helix. Fortunately, the band corresponding to the deoxyribose was detected in our SERS spectra. Inspecting the double helix conformation, the deoxyribose is wrapped inside the phosphate group and stays relatively far from the surface of silver nanoparticles. The signal of deoxyribose is less likely to have major changes by the base stacking changes, making its peak intensity a more reliable internal standard. To profoundly demonstrate the feasibility and accuracy of the SERS method to analyze the stacking effect on the SERS spectra of the DNA hairpins, we normalized the peaks of 2HP4a and 2HP4b with the intensity of deoxyribose (Figure S2B). Comparing the SERS bands of G and A ring breathing at  $655\text{ cm}^{-1}$  and  $731\text{ cm}^{-1}$  normalized by the phosphate band, the two band intensity normalized by deoxyribose shows less different but still distinguishable spectra.

In another sets of experiments, our hypothesis was further confirmed. Figure S4 exhibits the SERS spectra of complemented double-strand DNA, DS1-DC1, and DS1-DX1, normalized at the peak intensity of the phosphate group. It can be observed the significant increment of the ring breathing signal of guanine and adenine, clearly, after the mismatch, one certain pair of bases have muted into an adenine-guanine base pair, which is not able to form the hydrogen bond with each other. However, the peak intensity at  $1703\text{ cm}^{-1}$  (represent the dG v C=O H-bond) increases unusually, which

contradicts with the decrease of numbers of G-C base pairs caused by mutation. Therefore, this again proves that the peak intensity at 1089  $\text{cm}^{-1}$  is not suitable as a perfect internal standard for signal normalization.

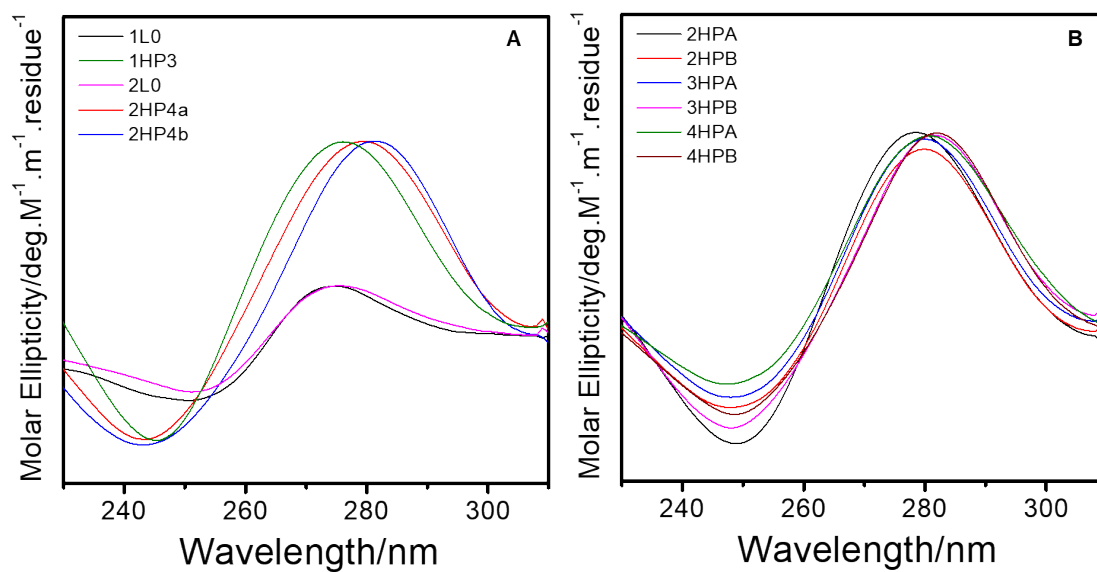

**Figure S1** CD spectra of DNA strands of A) 1L0, 1HP3, 2L0, 2HP4a, 2HP4b and B) 2HPB, 2HPA, 3HPB, 3HPA, 4HPB and 4HPA annealing at 100  $\mu\text{M}$  DNA concentration and 50 mM ammonium acetate and detected at 25  $\mu\text{M}$  DNA concentration after sequence dilution.

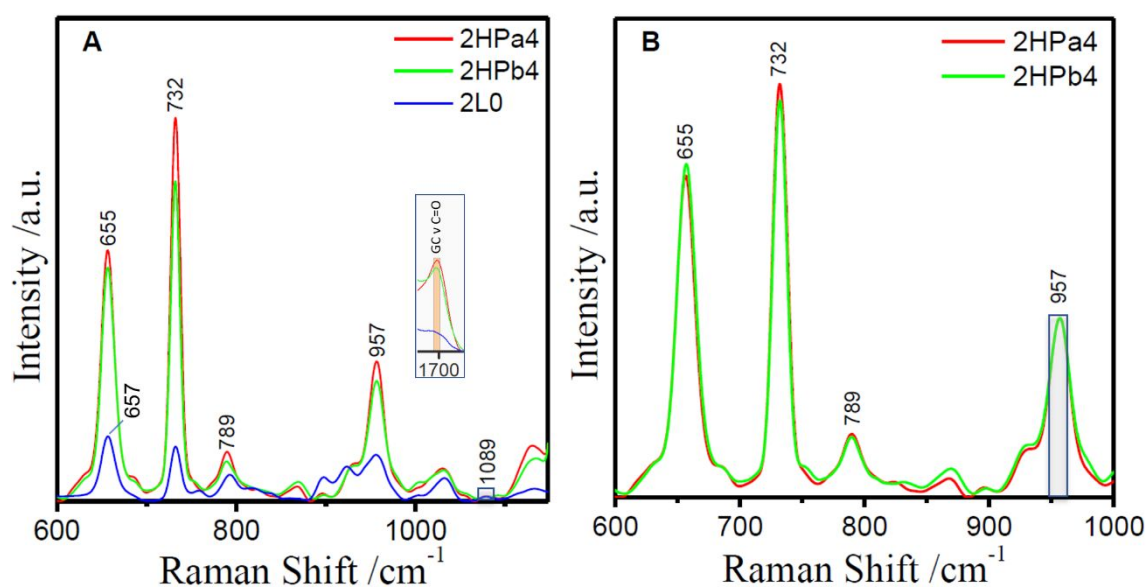

**Figure S2** A) The SERS spectra of a DNA random coil 2L0 (blue line) and two distinct hairpins 2HPa4 (red line) and 2HPb4 (green line). Above SERS spectra normalized by the intensity of phosphate band at  $1089\text{ cm}^{-1}$ ; B) The SERS spectra of 2HPa4 and 2HPb4 (normalized by the intensity of deoxyribose band at  $957\text{ cm}^{-1}$ ).

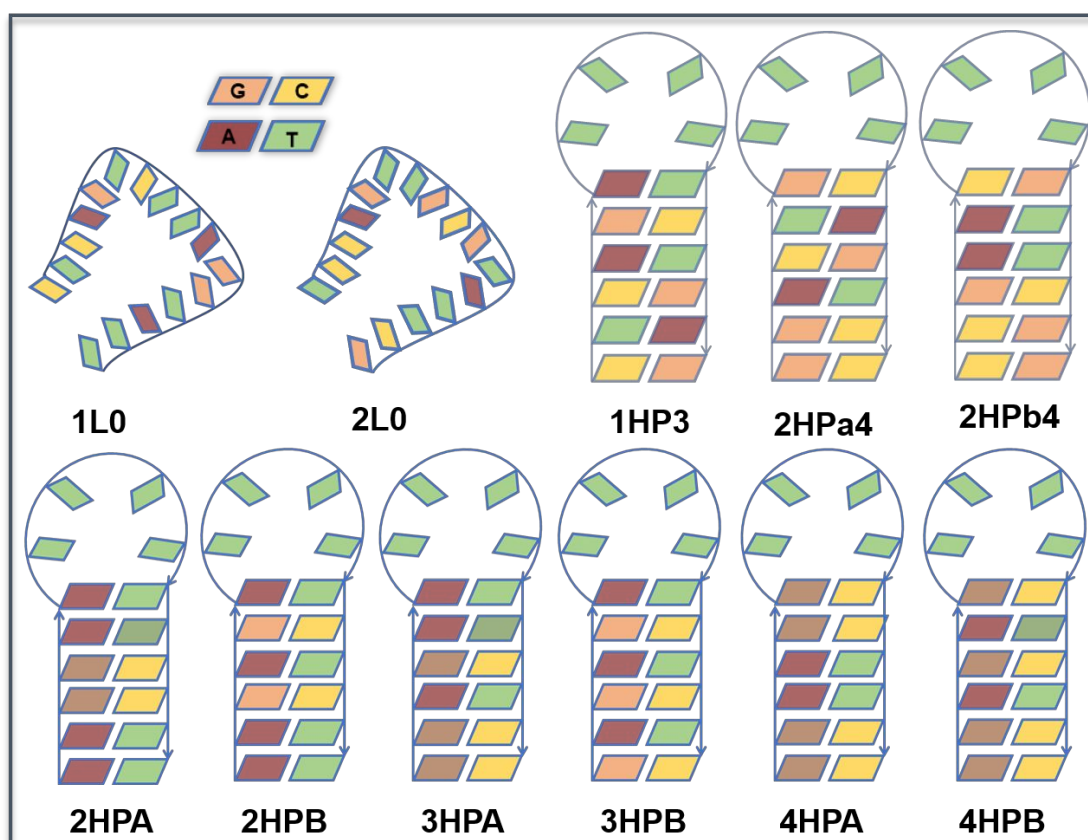

**Figure S3** Schematic diagram of 1L0, 2L0 and nine hairpin structures formed by 1HP3, 2HPa4, 2HPb4, 2HPA, 2HPB, 3HPA, 3HPB, 4HPA and 4HPB.

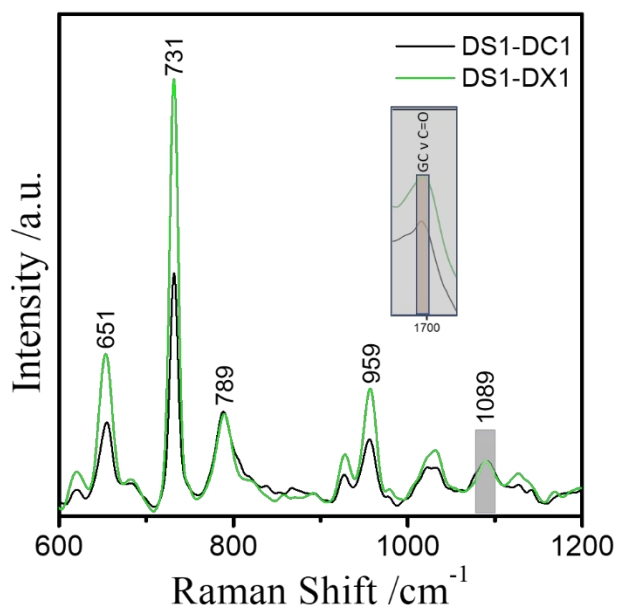

**Figure S4.** The SERS spectra of DS1-DC1 and DS1-DX1 double helices normalized at the peak intensity of phosphate group at 1089  $\text{cm}^{-1}$

**Table S1.** The bands and their assignment appeared in the SERS spectra of DNA hairpin[1HP3&1L0]<sub>4</sub>

| Raman Shift/ $\text{cm}^{-1}$ |      | Assignment              |                              | Ref.      |
|-------------------------------|------|-------------------------|------------------------------|-----------|
| 1L0                           | 1HP3 | ss DNA                  | DNA hairpin                  |           |
| 571                           | 570  | dG                      | dG C2'-endo/ <i>anti</i>     | [2, 3, 4] |
| -                             | 620  | -                       | Loop                         | [3,4]     |
| 654                           | 651  | dG R6 ring br           | dG ring br,                  | [2, 3, 5] |
| 732                           | 732  | dA                      | dA ring br                   | [3, 4, 5] |
| 789                           | 788  | dC                      | dC ring br                   | [3, 4, 5] |
| 794                           | 798  | $\nu_s$ OPO             | $\nu_s$ OPO; dC ring br      | [2, 4, 5] |
| 860                           | 864  | $\nu$ OPO               | $\nu$ OPO, bk                | [2, 3, 4] |
| 925                           | 929  | d                       | bk                           | [2, 3, 4] |
| 951                           | 959  | d                       | d, dG $\delta$ R5            | [3, 4, 5] |
| 1033                          | 1031 | d ( $\nu$ C-O)          | d ( $\nu$ C-O)               | [3, 4, 5] |
| 1089                          | 1089 | $\nu_s$ $\text{PO}_2^-$ | $\nu_s$ $\text{PO}_2^-$ , bk | [2, 3, 4] |
| 1184                          | 1220 | dT                      | dT C2'-endo/ <i>anti</i>     | [2, 4]    |
| 1251                          | 1247 | dT, dG                  | dT, dG $\delta$ NH(N2)       | [4, 5]    |
| 1324                          | 1324 | dG                      | dG C2'-endo/ <i>anti</i>     | [3, 4]    |
| -                             | 1337 | -                       | dG C2'-endo/ <i>syn</i>      | [3, 4]    |
| -                             | 1385 | -                       | dG C2'-endo/ <i>syn</i>      | [4, 5]    |
| -                             | 1585 | -                       | dG $\delta$ NH (N2H H-bond)  | [3, 4]    |
| 1650                          | 1660 | dT                      | dT, dC $\nu$ C5=C6           | [3, 4, 5] |

|   |      |   |                 |        |
|---|------|---|-----------------|--------|
| - | 1703 | - | dG v C=O H-bond | [3, 4] |
|---|------|---|-----------------|--------|

Note: d = deoxyribose, v = stretch,  $\delta$  = deformation, br = breathing, s = symmetric, s = shoulder, bk = backbone.

## References

- (1) Li, Y.; Han, X.; Yan, Y.; Cao, Y.; Xiang, X.; Wang, S.; Zhao, B.; Guo, X. Label-Free Detection of Tetramolecular i-Motifs by Surface-Enhanced Raman Spectroscopy. *Anal. Chem.* **2018**, *90*, 2996-3000.
- (2) Deng, H.; Bloomfield, V. A.; Benevides, J. M.; Thomas, G. J. Dependence of the Raman signature of genomic B-DNA on nucleotide base sequence. *Biopolymers* **1999**, *50*, 656-666.
- (3) Friedman, S. J.; Terentis, A. C. Friedman, S. J.; Terentis, A. C. Analysis of G-quadruplex conformations using Raman and polarized Raman spectroscopy. *J. Raman Spectrosc.* **2016**, *47*, 259-268.
- (4) Krafft, C.; Benevides, J. M.; Jr, T. G. Secondary structure polymorphism in Oxytricha nova telomeric DNA. *Nucleic Acids Res.* **2002**, *30*, 3981-3991.
- (5) Papadopoulou, E.; Bell, S. E. J. Label-Free Detection of Single-Base Mismatches in DNA by Surface-Enhanced Raman Spectroscopy. *Angew. Chem.* **2011**, *123*, 9224-9227.
